# Supplementary material for: Crosstalk between Cancer Cells and Cancer-Associated Fibroblasts Mediated by TGF-β1–IGFBP7 Signaling Promotes the Progression of Infiltrative Gastric Cancer
Source: MDPI journal article supplement (doi:10.3390/cancers15153965), 2023-08-04
Supplement: s1 [file s1]

Supplementary Table S1.

| The canonical marker genes used for annotating major cell types. |         |                  |              |             |               |                   |            |
|------------------------------------------------------------------|---------|------------------|--------------|-------------|---------------|-------------------|------------|
| B cells                                                          | T cells | Epithelial cells | Plasma cells | Fibroblasts | Myeloid cells | Endothelial cells | Mast cells |
| CD79A[1]                                                         | CD2[1]  | EPCAM[2]         | JCHAIN[3]    | ACTA2[1]    | CD14[2]       | VWF[1]            | KIT[4]     |
| CD79B[4]                                                         | CD3E[1] | TFF1[5]          | DERL3[6]     | COL1A1[2]   | CD163[2]      | ENG[1]            | CPA3[1]    |
| MS4A1[1]                                                         | CD3D[1] | KRT8[2]          | MZB1[6]      | DCN[3]      | CD68[2]       | PECAM1[3]         | TPSB2[4]   |
|                                                                  |         |                  |              | PDGFRB[4]   |               |                   |            |

1. Zhang, M.; Hu, S.; Min, M.; Ni, Y.; Lu, Z.; Sun, X.; Wu, J.; Liu, B.; Ying, X.; Liu, Y. Dissecting transcriptional heterogeneity in primary gastric adenocarcinoma by single cell RNA sequencing. *Gut* **2021**, *70*, 464-475, doi:10.1136/gutjnl-2019-320368.
2. Wang, R.; Dang, M.; Harada, K.; Han, G.; Wang, F.; Pool Pizzi, M.; Zhao, M.; Tatlonghari, G.; Zhang, S.; Hao, D.; et al. Single-cell dissection of intratumoral heterogeneity and lineage diversity in metastatic gastric adenocarcinoma. *Nat Med* **2021**, *27*, 141-151, doi:10.1038/s41591-020-1125-8.
3. Luo, H.; Xia, X.; Huang, L.B.; An, H.; Cao, M.; Kim, G.D.; Chen, H.N.; Zhang, W.H.; Shu, Y.; Kong, X.; et al. Pan-cancer single-cell analysis reveals the heterogeneity and plasticity of cancer-associated fibroblasts in the tumor microenvironment. *Nat Commun* **2022**, *13*, 6619, doi:10.1038/s41467-022-34395-2.
4. Zhao, W.; Jia, Y.; Sun, G.; Yang, H.; Liu, L.; Qu, X.; Ding, J.; Yu, H.; Xu, B.; Zhao, S.; et al. Single-cell analysis of gastric signet ring cell carcinoma reveals cytological and immune microenvironment features. *Nat Commun* **2023**, *14*, 2985, doi:10.1038/s41467-023-38426-4.
5. Kumar, V.; Ramnarayanan, K.; Sundar, R.; Padmanabhan, N.; Srivastava, S.; Koiwa, M.; Yasuda, T.; Koh, V.; Huang, K.K.; Tay, S.T.; et al. Single-Cell Atlas of Lineage States, Tumor Microenvironment, and Subtype-Specific Expression Programs in Gastric Cancer. *Cancer Discov* **2022**, *12*, 670-691, doi:10.1158/2159-8290.CD-21-0683.
6. Patil, N.S.; Nabet, B.Y.; Muller, S.; Koeppen, H.; Zou, W.; Giltane, J.; Au-Yeung, A.; Srivats, S.; Cheng, J.H.; Takahashi, C.; et al. Intratumoral plasma cells predict outcomes to PD-L1 blockade in non-small cell lung cancer. *Cancer Cell* **2022**, *40*, 289-300 e284, doi:10.1016/j.ccell.2022.02.002.
